# Supplementary material for: Tumor Stroma Area and Other Prognostic Factors in Pancreatic Ductal Adenocarcinoma Patients Submitted to Surgery
Source: MDPI journal article supplement (doi:10.3390/diagnostics13040655), 2023-02-09
Supplement: s1 [file s1]

## Supplementary Materials

**Table S1** – Descriptive statistics of the study population.

IQR: interquartile range; AST: aspartate aminotransferase; ALT: alanine aminotransferase; AP: alkaline phosphatase; GGT: gamma-glutamyl transferase; BR: bilirubin; CA 19.9: carbohydrate antigen 19.9; CEA: carcinoembryonic antigen; CPD: cephalic pancreaticoduodenectomy; DDP: distal pancreatectomy; TDP: total pancreatectomy; CT: chemotherapy; RT: radiotherapy

| Variable                              | N=148               |
|---------------------------------------|---------------------|
| <b>Age</b>                            |                     |
| Median (IQR)                          | 70 (61-76)          |
| Min-Max                               | 40-93               |
| <b>Sex</b>                            |                     |
| Male                                  | 93 (62.8%)          |
| Female                                | 55 (37.2%)          |
| <b>Arterial hypertension</b>          | 88 (59.5%)          |
| <b>Dyslipidemia</b>                   | 55 (37.2%)          |
| <b>Type 2 Diabetes mellitus</b>       | 55 (37.2%)          |
| Metformin                             | 28 (18.9%)          |
| <b>Past history of other cancers</b>  | 17 (11.5%)          |
| <b>Abdominal pain</b>                 | 64 (43.2%)          |
| <b>Jaundice</b>                       | 93 (62.8%)          |
| <b>Charlson comorbidity index</b>     |                     |
| Median (IQR)                          | 5 (4-6)             |
| Min-Max                               | 0-11                |
| <b>Preoperative sodium (mEq/L)</b>    |                     |
| Median (IQR)                          | 137.0 (135.0-140.0) |
| Min-Max                               | 124.0-144.7         |
| <b>Preoperative AST (U/L)</b>         |                     |
| Median (IQR)                          | 60.0 (28.0-131.0)   |
| Min-Max                               | 9-668               |
| <b>Preoperative ALT (U/L)</b>         |                     |
| Median (IQR)                          | 72.0 (31.0-170.5)   |
| Min-Max                               | 7-922               |
| <b>Preoperative AP (U/L)</b>          |                     |
| Median (IQR)                          | 278.5 (118.5-458.0) |
| Min-Max                               | 38-2100             |
| <b>Preoperative GGT (U/L)</b>         |                     |
| Median (IQR)                          | 250.5 (69.3-635.8)  |
| Min-Max                               | 10-3001             |
| <b>Preoperative total BR (mg/dL)</b>  |                     |
| Median (IQR)                          | 8.4 (1.0-17.2)      |
| Min-Max                               | 0.2-31.7            |
| <b>Preoperative direct BR (mg/dL)</b> |                     |
| Median (IQR)                          | 8.7 (2.5-14.1)      |
| Min-Max                               | 0.4-347.0           |
| <b>Preoperative albumin (g/dL)</b>    |                     |
| Median (IQR)                          | 3.7 (3.3-4.2)       |
| Min-Max                               | 1.7-41.0            |
| <b>Preoperative CA 19.9 (U/mL)</b>    |                     |
| Median (IQR)                          | 225.8 (36.3-978.8)  |

|                                                |               |
|------------------------------------------------|---------------|
| Min-Max                                        | 2.0-23911.0   |
| <b>Preoperative CEA (ng/mL)</b>                |               |
| Median (IQR)                                   | 3.3 (1.9-6.1) |
| Min-Max                                        | 0.6-179297.0  |
| <b>Prolonged hospitalization (≥17 days)</b>    | 83 (56.1%)    |
| <b>Type of Surgery</b>                         |               |
| CPD                                            | 124 (83.8%)   |
| DP                                             | 17 (11.5%)    |
| TP                                             | 7 (4.7%)      |
| <b>Clavien-Dindo</b>                           |               |
| No complications                               | 24 (16.2%)    |
| I                                              | 21 (14.2%)    |
| II                                             | 57 (38.5%)    |
| IIIa                                           | 20 (13.5%)    |
| IIIb                                           | 5 (3.4%)      |
| IVa                                            | 2 (1.4%)      |
| IVb                                            | 4 (2.7%)      |
| V                                              | 13 (8.8%)     |
| <b>Postoperative pancreatic fistula (POPF)</b> |               |
| No                                             | 93 (62.8%)    |
| BL                                             | 20 (13.5%)    |
| B                                              | 12 (8.1%)     |
| C                                              | 12 (8.1%)     |
| <b>Delayed gastric emptying (DGE)</b>          |               |
| No                                             | 61 (41.2%)    |
| A                                              | 44 (29.7%)    |
| B                                              | 25 (16.9%)    |
| C                                              | 16 (10.8%)    |
| <b>Adjuvant treatment</b>                      |               |
| No                                             | 58 (39.2%)    |
| CT                                             | 46 (31.1%)    |
| CT+RT                                          | 40 (27.0%)    |

**Table S2 – Descriptive statistics of pathological characteristics.**  
IQR: interquartile range

| <b>Variable</b>                |                                | <b>N=148</b>    |
|--------------------------------|--------------------------------|-----------------|
| <b>Stage</b>                   | I                              | 28 (18.9%)      |
|                                | II                             | 77 (52.0%)      |
|                                | III                            | 31 (20.9%)      |
|                                | IV                             | 12 (8.1%)       |
|                                |                                |                 |
| <b>T</b>                       | T1                             | 14 (9.5%)       |
|                                | T2                             | 97 (65.5%)      |
|                                | T3                             | 37 (25.0%)      |
|                                | T4                             | 0 (0%)          |
|                                |                                |                 |
| <b>N</b>                       | N0                             | 35 (23.6%)      |
|                                | N1                             | 79 (53.4%)      |
|                                | N2                             | 34 (23.0%)      |
|                                |                                |                 |
| <b>Metastases</b>              | M0                             | 133 (89.9%)     |
|                                | M1                             | 15 (10.1%)      |
|                                |                                |                 |
| <b>Resected lymph nodes</b>    |                                |                 |
|                                | Median (IQR)                   | 18 (13-25)      |
|                                | Min-Max                        | 3-62            |
| <b>Invaded lymph nodes</b>     |                                |                 |
|                                | Median (IQR)                   | 2 (1-3)         |
|                                | Min-Max                        | 0-12            |
| <b>Lymph nodes ratio</b>       |                                |                 |
|                                | Median (IQR)                   | 009 (0.03-0.19) |
|                                | Min-Max                        | 0.00-0.86       |
| <b>Histological grade</b>      |                                |                 |
|                                | Well differentiated (G1)       | 49 (33.1%)      |
|                                | Moderately differentiated (G2) | 76 (51.4%)      |
|                                | Poorly differentiated (G3)     | 12 (8.1%)       |
| <b>Perineural invasion</b>     |                                | 133 (89.9%)     |
| <b>Lymphovascular invasion</b> |                                | 117 (79.1%)     |
| <b>Resection margin</b>        |                                |                 |
|                                | R0                             | 73 (49.3%)      |
|                                | R1                             | 66 (44.6%)      |
|                                | R2                             | 9 (6.1%)        |
| <b>Tumor size (cm)</b>         |                                |                 |
|                                | Median (IQR)                   | 3,2 (2.5-4.0)   |
|                                | Min-Max                        | 0.4-11.0        |

**Table S3** – Influence of other variables on overall survival (OS).

OS: overall survival; AST: aspartate aminotransferase; ALT: alanine aminotransferase; AP: alkaline phosphatase; GGT: gamma-glutamyl transferase; CEA: carcinoembryonic antigen; CPD: cephalic pancreaticoduodenectomy; POPF: postoperative pancreatic fistula; DGE: Delayed gastric emptying; CT: chemotherapy; RT: radiotherapy

| Variable                                           | Median OS (months) | <i>p</i> |
|----------------------------------------------------|--------------------|----------|
| <b>Age</b>                                         |                    |          |
| <70                                                | 18                 | 0.345    |
| ≥70                                                | 18                 |          |
| <b>Sex</b>                                         |                    |          |
| Male                                               | 18                 | 0.749    |
| Female                                             | 19                 |          |
| <b>Dyslipidemia</b>                                |                    |          |
| No                                                 | 18                 | 0.698    |
| Yes                                                | 17                 |          |
| <b>Metformin</b>                                   |                    |          |
| No                                                 | 16                 | 0.437    |
| Yes                                                | 13                 |          |
| <b>Past history of other cancers</b>               |                    |          |
| No                                                 | 18                 | 0.337    |
| Yes                                                | 18                 |          |
| <b>Jaundice</b>                                    |                    |          |
| No                                                 | 17                 | 0.075    |
| Yes                                                | 20                 |          |
| <b>Preoperative hyponatremia (&lt;135 mEq/L)</b>   |                    |          |
| No                                                 | 19                 | 0.430    |
| Yes                                                | 16                 |          |
| <b>Preoperative AST</b>                            |                    |          |
| Normal                                             | 19                 | 0.800    |
| High (≥35 U/L)                                     | 17                 |          |
| <b>Preoperative ALT</b>                            |                    |          |
| Normal                                             | 19                 | 0.079    |
| High (≥45 U/L)                                     | 17                 |          |
| <b>Preoperative AP</b>                             |                    |          |
| Normal                                             | 20                 | 0.956    |
| High (≥120 U/L)                                    | 17                 |          |
| <b>Preoperative GGT</b>                            |                    |          |
| Normal                                             | 21                 | 0.382    |
| High (≥55 U/L)                                     | 17                 |          |
| <b>Preoperative hypoalbuminemia (&lt;3,5 g/dL)</b> |                    |          |
| No                                                 | 18                 | 0.632    |
| Yes                                                | 17                 |          |
| <b>Preoperative CEA</b>                            |                    |          |
| ≤5 ng/mL                                           | 21                 | 0.764    |
| >5 ng/mL                                           | 17                 |          |
| <b>Type of surgery</b>                             |                    |          |
| CPD                                                | 18                 | 0.333    |
| Others                                             | 18                 |          |
| <b>Surgery duration</b>                            |                    |          |
| <7h                                                | 20                 | 0.711    |
| ≥7h                                                | 18                 |          |
| <b>Blood transfusion</b>                           |                    |          |
| No                                                 | 17                 | 0.851    |
| Yes                                                | 19                 |          |
| <b>POPF</b>                                        |                    |          |
| No                                                 | 18                 | 0.788    |
| Yes                                                | 20                 |          |
| <b>POPF grade</b>                                  |                    |          |

|                                         |    |       |
|-----------------------------------------|----|-------|
| <i>Biochemical leak</i>                 | 24 |       |
| Grade B e C                             | 13 | 0.082 |
| <b>DGE</b>                              |    |       |
| Grade A                                 | 21 |       |
| Grade B ou C                            | 15 | 0.414 |
| <b>Histological grade</b>               |    |       |
| Well differentiated                     | 19 |       |
| Moderately/poorly differentiated        | 17 | 0.203 |
| <b>Perineural invasion</b>              |    |       |
| No                                      | 30 |       |
| Yes                                     | 17 | 0.906 |
| <b>Type of adjuvant treatment</b>       |    |       |
| CT                                      | 21 |       |
| CT+RT                                   | 21 | 0.785 |
| <b>Local recurrence</b>                 |    |       |
| No                                      | 19 |       |
| Yes                                     | 18 | 0.124 |
| <b>Distant recurrence</b>               |    |       |
| No                                      | 18 |       |
| Yes                                     | 17 | 0.390 |
| <b>Local and distant recurrence</b>     |    |       |
| No                                      | 18 |       |
| Yes                                     | 19 | 0.899 |
| <b>Pulmonary recurrence</b>             |    |       |
| No                                      | 19 |       |
| Yes                                     | 17 | 0.480 |
| <b>Hepatic recurrence</b>               |    |       |
| No                                      | 20 |       |
| Yes                                     | 15 | 0.127 |
| <b>Pulmonary and hepatic recurrence</b> |    |       |
| No                                      | 18 |       |
| Yes                                     | 21 | 0.739 |
| <b>Peritoneal recurrence</b>            |    |       |
| No                                      | 19 |       |
| Yes                                     | 18 | 0.280 |

**Table S4** – Influence of other variables disease-free survival (DFS).

DFS: disease-free survival; AST: aspartate aminotransferase; ALT: alanine aminotransferase; AP: alkaline phosphatase; GGT: gamma-glutamyl transferase; CEA: carcinoembryonic antigen; CPD: cephalic pancreaticoduodenectomy; POPF: postoperative pancreatic fistula; DGE: delayed gastric emptying; CT: chemotherapy; RT: radiotherapy

| Variable                                           | Median DFS (months) | <i>p</i> |
|----------------------------------------------------|---------------------|----------|
| <b>Age</b>                                         |                     |          |
| <70 years                                          | 10                  |          |
| ≥70 years                                          | 10                  | 0.698    |
| <b>Sex</b>                                         |                     |          |
| Male                                               | 10                  |          |
| Female                                             | 10                  | 0.631    |
| <b>Arterial hypertension</b>                       |                     |          |
| No                                                 | 10                  |          |
| Yes                                                | 10                  | 0.331    |
| <b>Dyslipidemia</b>                                |                     |          |
| No                                                 | 10                  |          |
| Yes                                                | 10                  | 0.359    |
| <b>Type 2 Diabetes mellitus</b>                    |                     |          |
| No                                                 | 10                  |          |
| Yes                                                | 9                   | 0.244    |
| <b>Metformin</b>                                   |                     |          |
| No                                                 | 10                  |          |
| Yes                                                | 9                   | 0.625    |
| <b>Past history of other cancers</b>               |                     |          |
| No                                                 | 10                  |          |
| Yes                                                | 7                   | 0.537    |
| <b>Abdominal pain</b>                              |                     |          |
| No                                                 | 10                  |          |
| Yes                                                | 10                  | 0.140    |
| <b>Jaundice</b>                                    |                     |          |
| No                                                 | 11                  |          |
| Yes                                                | 10                  | 0.851    |
| <b>Preoperative hyponatremia (&lt;135 mEq/L)</b>   |                     |          |
| No                                                 | 10                  |          |
| Yes                                                | 9                   | 0.345    |
| <b>Preoperative ALT</b>                            |                     |          |
| Normal                                             | 12                  |          |
| High (≥45 U/L)                                     | 9                   | 0.229    |
| <b>Preoperative AP</b>                             |                     |          |
| Normal                                             | 12                  |          |
| High (≥120 U/L)                                    | 10                  | 0.352    |
| <b>Preoperative GGT</b>                            |                     |          |
| Normal                                             | 12                  |          |
| High(≥55 U/L)                                      | 10                  | 0.366    |
| <b>Preoperative hypoalbuminemia (&lt;3,5 g/dL)</b> |                     |          |
| No                                                 | 10                  |          |
| Yes                                                | 7                   | 0.152    |
| <b>Preoperative CEA</b>                            |                     |          |
| ≤5 ng/mL                                           | 11                  |          |
| >5 ng/mL                                           | 8                   | 0.572    |
| <b>Type of surgery</b>                             |                     |          |
| CPD                                                | 10                  |          |
| Others                                             | 12                  | 0.714    |
| <b>Surgery duration</b>                            |                     |          |
| <7h                                                | 10                  |          |
| ≥7h                                                | 9                   | 0.246    |
| <b>Blood transfusion</b>                           |                     |          |

|                                   |                                  |    |       |
|-----------------------------------|----------------------------------|----|-------|
|                                   | No                               | 9  |       |
|                                   | Yes                              | 11 | 0.872 |
| <b>Clavien-Dindo</b>              |                                  |    |       |
|                                   | I, II, IIIa                      | 10 |       |
|                                   | IIIb, IV, V                      | 6  | 0.500 |
| <b>POPF</b>                       |                                  |    |       |
|                                   | No                               | 10 |       |
|                                   | Yes                              | 8  | 0.345 |
| <b>POPF grade</b>                 |                                  |    |       |
|                                   | <i>Biochemical leak</i>          | 10 |       |
|                                   | Grade B e C                      | 8  | 0.809 |
| <b>DGE</b>                        |                                  |    |       |
|                                   | Grade A                          | 10 |       |
|                                   | Grade B ou C                     | 6  | 0.442 |
| <b>Stage</b>                      |                                  |    |       |
|                                   | I-II                             | 10 |       |
|                                   | III-IV                           | 6  | 0.448 |
| <b>T</b>                          |                                  |    |       |
|                                   | T1-2                             | 10 |       |
|                                   | T3-4                             | 10 | 0.889 |
| <b>Lymph nodes</b>                |                                  |    |       |
|                                   | N0                               | 12 |       |
|                                   | N+                               | 10 | 0.114 |
| <b>Histological grade</b>         |                                  |    |       |
|                                   | Well differentiated              | 10 |       |
|                                   | Moderately/poorly differentiated | 10 | 0.565 |
| <b>Perineural invasion</b>        |                                  |    |       |
|                                   | No                               | 12 |       |
|                                   | Yes                              | 10 | 0.336 |
| <b>Lymphovascular invasion</b>    |                                  |    |       |
|                                   | No                               | 11 |       |
|                                   | Yes                              | 10 | 0.723 |
| <b>Resection margin</b>           |                                  |    |       |
|                                   | R0                               | 11 |       |
|                                   | R1-2                             | 8  | 0.119 |
| <b>Tumor size (cm)</b>            |                                  |    |       |
|                                   | ≤2                               | 13 |       |
|                                   | >2                               | 10 | 0.924 |
| <b>Adjuvant treatment</b>         |                                  |    |       |
|                                   | No                               | 8  |       |
|                                   | Yes                              | 10 | 0.416 |
| <b>Type of adjuvant treatment</b> |                                  |    |       |
|                                   | CT                               | 10 |       |
|                                   | CT+RT                            | 10 | 0.999 |
